# Supplementary material for: JAK1 palmitoylation by ZDHHC3/7 is Essential for Neuropoietic Cytokine Signaling and DRG Neuron Survival
Source: bioRxiv or medRxiv preprint supplement (doi:10.1101/2020.11.16.385971), 2020-11-17

Supplementary Information for

**JAK1 palmitoylation by ZDHHC3/7 is Essential for Neuropoietic Cytokine Signaling and DRG Neuron Survival**

Luiselys M. Hernandez, Audrey Montersino, Jingwen Niu, Shuchi Guo and  
Gareth M. Thomas

## Supplementary Figure Legends:

**Figure S1. Confirmation of JAK1 knockdown and rescue and requirement of palmitoylation for CNTF-induced JAK1 signaling. A:** Western blots of DRG neuron lysates infected with the indicated lentiviruses. JAK1 shRNA lentivirus greatly reduces JAK1 protein levels, which are rescued by shRNA-resistant JAK1WT or –CCSS (JAK1WT\*, JAK1CCSS\*). JAK1WT\* and JAK1CCSS\* express at broadly similar levels.

**Figure S2. Confirmation of effective knockdown of cognate targets by *Zdhhc3* and *Zdhhc7* shRNAs. A:** HEK293T cells were cotransfected to express HA-tagged rat ZDHHC3 plus either a scrambled shRNA or shRNA against rat *Zdhhc3*. The shRNA greatly reduces ZDHHC3 protein levels and was used for subsequent experiments in neurons. **B:** As A, except that HEK293T cells were cotransfected to express HA-tagged ZDHHC7 plus either a scrambled shRNA or one of four shRNAs against rat *Zdhhc7*. The second of these shRNAs (ZDHHC7shB) most effectively reduced ZDHHC7 protein levels and was used for subsequent experiments in neurons.

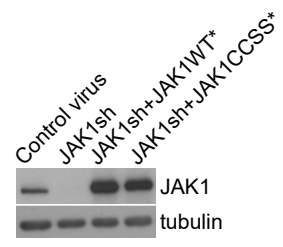

**A**

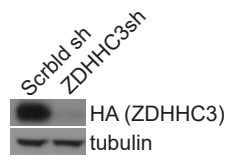

**B**

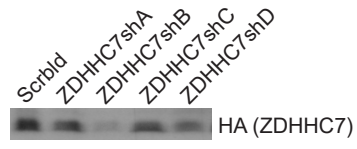

Supplement: Supplementary file [file media-1.pdf]
